# Supplementary material for: Faster life history strategy manifests itself by lower age at menarche, higher sexual desire, and earlier reproduction in people with worse health
Source: PubMed Central journal article supplement (PMC8159921; doi:10.1038/s41598-021-90579-8), 2021-05-27
Supplement: 41598_2021_90579_MOESM1_ESM.pdf [file 41598_2021_90579_MOESM1_ESM.pdf]

# **Faster life history strategy manifests itself by lower age at menarche, higher sexual desire, and earlier reproduction in people with worse health**

Kateřina Sýkorová<sup>a,\*</sup> and Jaroslav Flegr<sup>a,b</sup>

<sup>a</sup> Department of Philosophy and History of Science, Faculty of Science, Charles University, Vinicna 7, 128 00, Prague, Czech Republic

<sup>b</sup> Department of Applied Neurosciences and Brain Imagination, National Institute of Mental Health, Topolova 748, Klecany, Czech Republic

\*Corresponding author at: Department of Philosophy and History of Sciences, Faculty of Science, Charles University, Vinicna 7, 128 00, Prague, CZ

E-mail address: sykorok6@natur.cuni.cz

## **Supplementary materials**

|                                            | question scale   | women  |       | men    |       |
|--------------------------------------------|------------------|--------|-------|--------|-------|
|                                            |                  | mean   | s.d.  | mean   | s.d.  |
| age at menarche                            | direct responses | 12.75  | 1.38  |        |       |
| age at first sexual intercourse            | direct responses | 17.33  | 2.54  | 18.73  | 3.35  |
| sexual desire                              | scale 3-27       | 10.19  | 5.31  | 13.84  | 5.73  |
| sexual activity                            | scale 1-8        | 4.26   | 1.88  | 4.05   | 1.86  |
| number of sexual partners                  | scale 1-9        | 2.57   | 1.39  | 2.55   | 1.47  |
| number of children                         | direct responses | 0.91   | 1.08  | 0.94   | 1.15  |
| number of antibiotics                      | scale 0-8        | 0.78   | 1.21  | 0.55   | 0.92  |
| number of prescribed drugs                 | scale 0-8        | 0.48   | 1.00  | 0.53   | 1.16  |
| number of non-prescription drugs           | scale 0-8        | 0.86   | 1.17  | 0.60   | 1.04  |
| number of visits to a general practitioner | scale 0-8        | 1.70   | 1.86  | 1.44   | 1.63  |
| number of medical specialists              | scale 0-8        | 2.69   | 2.12  | 1.95   | 1.76  |
| physical health problems                   | scale 0-100      | 38.85  | 20.98 | 35.17  | 20.56 |
| mental health problems                     | scale 0-100      | 31.93  | 22.40 | 26.03  | 20.31 |
| anxieties                                  | scale 0-100      | 22.48  | 26.23 | 13.90  | 20.19 |
| depressions                                | scale 0-100      | 22.37  | 26.14 | 15.87  | 21.56 |
| manias                                     | scale 0-100      | 8.37   | 16.95 | 7.16   | 15.40 |
| obsessions                                 | scale 0-100      | 10.36  | 19.06 | 8.67   | 16.65 |
| age                                        | direct responses | 31.55  | 12.02 | 35.81  | 12.42 |
| socioeconomic status                       | scale 0-100      | 59.41  | 22.15 | 64.08  | 22.00 |
| height                                     | direct responses | 167.82 | 6.49  | 181.35 | 7.12  |
| size of place of residence                 | scale 1-6        | 3.36   | 1.72  | 3.48   | 1.67  |
| education                                  | scale 1-5        | 2.55   | 1.05  | 2.70   | 1.14  |
| sickness index                             |                  | 0.00   | 0.62  | 0.00   | 0.59  |
|                                            | question code    | N      | %     | N      | %     |
| current partnership                        | 0                | 4,606  | 28.3  | 4,449  | 27.3  |
|                                            | 1                | 11,656 | 71.7  | 11,828 | 72.7  |
| church membership                          | 0                | 11,792 | 87    | 14,220 | 87.4  |
|                                            | 1                | 1,760  | 13    | 2,057  | 12.6  |
| Rh-negativity                              | 0                | 7,579  | 75.4  | 5,864  | 75.6  |
|                                            | 1                | 2,479  | 24.6  | 1,888  | 24.4  |

**Supplementary table S1.** Descriptive statistics of all variables used in the study. This table shows the means and standard deviations (s.d.) of all semi-continuous and ordinal variables and numbers (N) and percentages (%) of all binary variables for women and men. For binary variables, code 0 indicates no current partnership, no church membership, and having a positive Rh phenotype; code 1 indicates being in a partnership, church membership, and having a negative Rh phenotype.

|                                            |   | number of antibiotics | number of prescribed drugs | number of non-prescription drugs | number of visits to a general practitioner | number of medical specialists | physical health problems | mental health problems | anxieties     | depressions   | manias        | obsessions |
|--------------------------------------------|---|-----------------------|----------------------------|----------------------------------|--------------------------------------------|-------------------------------|--------------------------|------------------------|---------------|---------------|---------------|------------|
| number of antibiotics                      | ♀ | 1.000                 |                            |                                  |                                            |                               |                          |                        |               |               |               |            |
|                                            | ♂ | 1.000                 |                            |                                  |                                            |                               |                          |                        |               |               |               |            |
| number of prescribed drugs                 | ♀ | <b>0.104*</b>         | 1.000                      |                                  |                                            |                               |                          |                        |               |               |               |            |
|                                            | ♂ | <b>0.080*</b>         | 1.000                      |                                  |                                            |                               |                          |                        |               |               |               |            |
| number of non-prescription drugs           | ♀ | <b>0.066*</b>         | <b>0.119*</b>              | 1.000                            |                                            |                               |                          |                        |               |               |               |            |
|                                            | ♂ | <b>0.058*</b>         | <b>0.119*</b>              | 1.000                            |                                            |                               |                          |                        |               |               |               |            |
| number of visits to a general practitioner | ♀ | <b>0.416*</b>         | <b>0.201*</b>              | <b>0.084*</b>                    | 1.000                                      |                               |                          |                        |               |               |               |            |
|                                            | ♂ | <b>0.364*</b>         | <b>0.305*</b>              | <b>0.104*</b>                    | 1.000                                      |                               |                          |                        |               |               |               |            |
| number of medical specialists              | ♀ | <b>0.178*</b>         | <b>0.254*</b>              | <b>0.122*</b>                    | <b>0.254*</b>                              | 1.000                         |                          |                        |               |               |               |            |
|                                            | ♂ | <b>0.168*</b>         | <b>0.255*</b>              | <b>0.128*</b>                    | <b>0.274*</b>                              | 1.000                         |                          |                        |               |               |               |            |
| physical health problems                   | ♀ | <b>0.065*</b>         | <b>0.109*</b>              | -0.001                           | <b>0.087*</b>                              | <b>0.075*</b>                 | 1.000                    |                        |               |               |               |            |
|                                            | ♂ | <b>0.061*</b>         | <b>0.135*</b>              | -0.001                           | <b>0.106*</b>                              | <b>0.062*</b>                 | 1.000                    |                        |               |               |               |            |
| mental health problems                     | ♀ | <b>0.070*</b>         | <b>0.094*</b>              | <b>0.045*</b>                    | <b>0.084*</b>                              | <b>0.092*</b>                 | <b>0.260*</b>            | 1.000                  |               |               |               |            |
|                                            | ♂ | <b>0.042*</b>         | <b>0.066*</b>              | <b>0.062*</b>                    | <b>0.066*</b>                              | <b>0.087*</b>                 | <b>0.257*</b>            | 1.000                  |               |               |               |            |
| anxieties                                  | ♀ | <b>0.076*</b>         | <b>0.126*</b>              | <b>0.067*</b>                    | <b>0.101*</b>                              | <b>0.129*</b>                 | <b>0.124*</b>            | <b>0.385*</b>          | 1.000         |               |               |            |
|                                            | ♂ | <b>0.063*</b>         | <b>0.074*</b>              | <b>0.096*</b>                    | <b>0.078*</b>                              | <b>0.123*</b>                 | <b>0.108*</b>            | <b>0.379*</b>          | 1.000         |               |               |            |
| depressions                                | ♀ | <b>0.077*</b>         | <b>0.138*</b>              | <b>0.057*</b>                    | <b>0.094*</b>                              | <b>0.114*</b>                 | <b>0.124*</b>            | <b>0.416*</b>          | <b>0.578*</b> | 1.000         |               |            |
|                                            | ♂ | <b>0.049*</b>         | <b>0.069*</b>              | <b>0.080*</b>                    | <b>0.068*</b>                              | <b>0.103*</b>                 | <b>0.109*</b>            | <b>0.398*</b>          | <b>0.592*</b> | 1.000         |               |            |
| manias                                     | ♀ | <b>0.060*</b>         | <b>0.033*</b>              | <b>0.046*</b>                    | <b>0.063*</b>                              | <b>0.083*</b>                 | <b>0.046*</b>            | <b>0.215*</b>          | <b>0.373*</b> | <b>0.440*</b> | 1.000         |            |
|                                            | ♂ | <b>0.028*</b>         | <b>-0.025</b>              | <b>0.057*</b>                    | <b>0.027*</b>                              | <b>0.057*</b>                 | <b>0.035*</b>            | <b>0.182*</b>          | <b>0.402*</b> | <b>0.447*</b> | 1.000         |            |
| obsessions                                 | ♀ | <b>0.067*</b>         | <b>0.062*</b>              | <b>0.052*</b>                    | <b>0.073*</b>                              | <b>0.098*</b>                 | <b>0.081*</b>            | <b>0.228*</b>          | <b>0.420*</b> | <b>0.385*</b> | <b>0.480*</b> | 1.000      |
|                                            | ♂ | <b>0.047*</b>         | 0.009                      | <b>0.074*</b>                    | <b>0.043*</b>                              | <b>0.078*</b>                 | <b>0.083*</b>            | <b>0.226*</b>          | <b>0.452*</b> | <b>0.410*</b> | <b>0.472*</b> | 1.000      |

**Supplementary table S2.** Cross-correlations between source variables of the sickness index. This table shows Kendall's Taus for associations for women (♀) and men (♂). Associations with p values under 0.05 are in bold and those with p values under 0.005 are marked with asterisks.

|                                 |   | age    |                | socioeconomic status | current partnership | height         | size of place of residence | education      | church membership |
|---------------------------------|---|--------|----------------|----------------------|---------------------|----------------|----------------------------|----------------|-------------------|
|                                 |   | N      | Kendall's Tau  |                      |                     |                |                            |                |                   |
| age at menarche                 | ♀ | 10,123 | <b>0.081*</b>  | <b>0.016</b>         | 0.001               | <b>0.089*</b>  | -0.006                     | <b>0.029*</b>  | 0.001             |
| age at first sexual intercourse | ♀ | 10,166 | <b>0.167*</b>  | <b>0.020*</b>        | <b>-0.035*</b>      | <b>0.032*</b>  | 0.005                      | <b>0.212*</b>  | <b>0.089*</b>     |
|                                 | ♂ | 11,681 | <b>0.129*</b>  | 0.010                | <b>-0.025*</b>      | -0.004         | <b>-0.036*</b>             | <b>0.199*</b>  | <b>0.062*</b>     |
| sexual desire                   | ♀ | 10,448 | <b>-0.103*</b> | <b>-0.039*</b>       | <b>-0.221*</b>      | <b>0.017</b>   | <b>0.014</b>               | <b>-0.031*</b> | <b>-0.060*</b>    |
|                                 | ♂ | 12,150 | <b>-0.083*</b> | <b>-0.016</b>        | <b>-0.097*</b>      | 0.007          | <b>0.013</b>               | <b>-0.021*</b> | <b>-0.033*</b>    |
| sexual activity                 | ♀ | 10,426 | <b>-0.059*</b> | <b>0.028*</b>        | <b>0.367*</b>       | <b>0.025*</b>  | <b>-0.020*</b>             | -0.004         | <b>-0.019</b>     |
|                                 | ♂ | 12,180 | <b>0.024*</b>  | <b>0.070*</b>        | <b>0.379*</b>       | <b>0.042*</b>  | 0.005                      | <b>0.016</b>   | <b>-0.027*</b>    |
| number of sexual partners       | ♀ | 9,412  | <b>-0.056*</b> | <b>-0.019</b>        | <b>-0.047*</b>      | <b>0.025*</b>  | <b>0.028*</b>              | -0.003         | <b>-0.072*</b>    |
|                                 | ♂ | 12,111 | <b>0.022*</b>  | <b>0.043*</b>        | <b>0.081*</b>       | <b>0.028*</b>  | <b>0.022*</b>              | <b>0.016</b>   | <b>-0.051*</b>    |
| number of children              | ♀ | 8,499  | <b>0.587*</b>  | 0.009                | <b>0.104*</b>       | <b>-0.038*</b> | <b>-0.016</b>              | <b>-0.133*</b> | <b>0.069*</b>     |
|                                 | ♂ | 13,435 | <b>0.558*</b>  | <b>0.076*</b>        | <b>0.242*</b>       | <b>-0.018*</b> | -0.007                     | <b>0.030*</b>  | <b>0.073*</b>     |

**Supplementary table S3.** Associations of age and potential covariates with variables related to sexual life and reproduction. Columns 3 and 4 display numbers (N) of women (♀) and men (♂) and Kendall's Taus for associations with age. Columns to the right then show partial Kendall's Taus (age controlled). Current partnership and church membership were treated as binary variables with 0 indicating no current partnership and no church membership, and 1 indicating being in a partnership and church membership. Socioeconomic status, height, size of place of residence, and education were semi-continuous or ordinal variables where a higher value means a higher level reached in the given variable. Associations with p values under 0.05 are in bold and those with p values under 0.005 are marked with asterisks.

|                                 | women          |                       |                     |               |                            |                |                   |                |               |                          |                    |                         |                             |
|---------------------------------|----------------|-----------------------|---------------------|---------------|----------------------------|----------------|-------------------|----------------|---------------|--------------------------|--------------------|-------------------------|-----------------------------|
|                                 | age            | socio-economic status | current partnership | height        | size of place of residence | education      | church membership | sickness index | Rh-negativity | sickness-age interaction | Rh-age interaction | sickness-Rh interaction | sickness-age-Rh interaction |
| age at menarche                 | <b>0.136*</b>  |                       |                     | <b>0.107*</b> |                            | 0.023          |                   | <b>-0.082*</b> | 0.031         | -0.056                   | -0.052             | -0.018                  | 0.109                       |
| age at first sexual intercourse | <b>0.103*</b>  |                       | <b>-0.143*</b>      | <b>0.032</b>  |                            | <b>0.237*</b>  | <b>0.381*</b>     | -0.013         | 0.004         | 0.039                    | 0.001              | 0.005                   | 0.046                       |
| sexual desire                   | <b>-0.170*</b> | -0.015                | <b>-0.494*</b>      |               |                            | -0.010         | <b>-0.173*</b>    | <b>0.119*</b>  | -0.020        | <b>-0.060</b>            | 0.014              | -0.017                  | -0.008                      |
| sexual activity                 | <b>-0.168*</b> | -0.011                | <b>0.921*</b>       | 0.020         |                            |                |                   | <b>-0.086*</b> | -0.017        | <b>-0.106*</b>           | -0.024             | -0.005                  | -0.041                      |
| number of sexual partners       | <b>-0.135*</b> |                       | -0.008              | <b>0.025</b>  | 0.016                      |                | <b>-0.195*</b>    | -0.023         | -0.019        | <b>-0.119*</b>           | 0.055              | 0.045                   | -0.058                      |
| number of children              | <b>0.681*</b>  |                       | <b>0.330*</b>       | 0.005         |                            | <b>-0.058*</b> | <b>0.146*</b>     | <b>-0.067*</b> | 0.013         | <b>-0.088*</b>           | 0.033              | -0.037                  | -0.004                      |
|                                 | men            |                       |                     |               |                            |                |                   |                |               |                          |                    |                         |                             |
|                                 | age            | socio-economic status | current partnership | height        | size of place of residence | education      | church membership | sickness index | Rh-negativity | sickness-age interaction | Rh-age interaction | sickness-Rh interaction | sickness-age-Rh interaction |
| age at first sexual intercourse | <b>0.100*</b>  |                       | <b>-0.153*</b>      |               | <b>-0.046*</b>             | <b>0.196*</b>  | <b>0.248*</b>     | <b>0.070</b>   | <b>-0.084</b> | 0.010                    | -0.040             | -0.071                  | 0.002                       |
| sexual desire                   | <b>-0.151*</b> |                       | <b>-0.224*</b>      |               |                            | -0.002         | <b>-0.131*</b>    | <b>0.145*</b>  | 0.023         | <b>-0.062</b>            | 0.047              | -0.060                  | <b>0.157*</b>               |
| sexual activity                 | <b>-0.101*</b> | 0.010                 | <b>0.935*</b>       | 0.005         |                            |                | <b>-0.126*</b>    | <b>-0.164*</b> | 0.041         | <b>-0.052</b>            | 0.034              | -0.011                  | 0.083                       |
| number of sexual partners       | -0.016         | <b>0.036*</b>         | <b>0.180*</b>       | 0.016         | 0.018                      |                | <b>0.200*</b>     | -0.035         | <b>0.070</b>  | <b>-0.058</b>            | -0.056             | 0.011                   | 0.075                       |
| number of children              | <b>0.607*</b>  | 0.019                 | <b>0.489*</b>       |               | <b>-0.026*</b>             | 0.001          | <b>0.171*</b>     | -0.021         | 0.042         | <b>-0.093*</b>           | 0.030              | -0.063                  | -0.051                      |

**Supplementary table S4.** Associations of Rh-negativity and covariates with each variable related to sexual life and reproduction. This table shows the results (standardised beta coefficients) of eleven GLM analyses (Type III sums of squares) which analyse associations between variables related to sexual life and reproduction (first column) and Rh-negativity, the sickness index, and covariates. In accordance with preregistration, we included in all models only covariates with Kendall's Tau > 0.02 or < -0.02 for correlation with the output variables (see Supplementary table S3). Current partnership, church membership, and Rh-negativity were treated as binary variables with 0 indicating no current partnership, no church membership, and having a positive Rh phenotype, and 1 indicating being in a partnership, church membership, and having a negative Rh phenotype. Associations with p values under 0.05 are in bold and those with p values under 0.005 are marked with asterisks.

|                                 | women          |                      |                     |               |                            |                |                   |                |                                |
|---------------------------------|----------------|----------------------|---------------------|---------------|----------------------------|----------------|-------------------|----------------|--------------------------------|
|                                 | age            | socioeconomic status | current partnership | height        | size of place of residence | education      | church membership | sickness index | sickness index-age interaction |
| age at menarche                 | <b>0.115*</b>  |                      |                     | <b>0.116*</b> |                            | <b>0.018</b>   |                   | <b>-0.093*</b> | -0.013                         |
| age at first sexual intercourse | <b>0.122*</b>  |                      | <b>-0.109*</b>      | <b>0.028*</b> |                            | <b>0.250*</b>  | <b>0.339*</b>     | 0.004          | 0.038                          |
| sexual desire                   | <b>-0.155*</b> | <b>-0.013*</b>       | <b>-0.563*</b>      |               |                            | 0.003          | <b>-0.190*</b>    | <b>0.125*</b>  | <b>-0.056*</b>                 |
| sexual activity                 | <b>-0.165*</b> | -0.008               | <b>0.963*</b>       | <b>0.025*</b> |                            |                |                   | <b>-0.096*</b> | <b>-0.098*</b>                 |
| number of sexual partners       | <b>-0.110*</b> |                      | -0.047              | <b>0.033*</b> | <b>0.027</b>               |                | <b>-0.209*</b>    | -0.044         | <b>-0.106*</b>                 |
| number of children              | <b>0.708*</b>  |                      | <b>0.286*</b>       | 0.002         |                            | <b>-0.070*</b> | <b>0.128*</b>     | <b>-0.076*</b> | <b>-0.077*</b>                 |
|                                 | men            |                      |                     |               |                            |                |                   |                |                                |
|                                 | age            | socioeconomic status | current partnership | height        | size of place of residence | education      | church membership | sickness index | sickness index-age interaction |
| age at first sexual intercourse | <b>0.106*</b>  |                      | <b>-0.135*</b>      |               | <b>-0.045*</b>             | <b>0.207*</b>  | <b>0.188*</b>     | <b>0.062*</b>  | 0.014                          |
| sexual desire                   | <b>-0.121*</b> |                      | <b>-0.218*</b>      |               |                            | 0.012          | <b>-0.099*</b>    | <b>0.140*</b>  | <b>-0.054*</b>                 |
| sexual activity                 | <b>-0.090*</b> | <b>0.019</b>         | <b>1.005*</b>       | <b>0.023*</b> |                            |                | <b>-0.107*</b>    | <b>-0.158*</b> | <b>-0.043</b>                  |
| number of sexual partners       | -0.015         | <b>0.038*</b>        | <b>0.211*</b>       | <b>0.020</b>  | <b>0.017</b>               |                | <b>-0.145*</b>    | <b>-0.058*</b> | -0.024                         |
| number of children              | <b>0.628*</b>  | <b>0.022*</b>        | <b>0.422*</b>       |               | <b>-0.020*</b>             | <b>-0.014</b>  | <b>0.162*</b>     | <b>-0.041*</b> | <b>-0.109*</b>                 |

**Supplementary table S5.** Associations of the sickness index and covariates with each variable related to sexual life and reproduction in GLM analyses using Type I sums of squares. This table shows the results (standardised beta coefficients) of eleven univariate GLM analyses which analyse associations between variables related to sexual life and reproduction (first column) and the sickness index and covariates. In accordance with preregistration, each model includes only covariates with Kendall's Tau  $> 0.02$  or  $< -0.02$  for correlation with output variables (see Supplementary table S3). Current partnership and church membership were treated as binary variables with 0 indicating no current partnership and no church membership, and 1 indicating being in a partnership and church membership. Associations with p values under 0.05 are in bold and those with p values under 0.005 are marked with asterisks.

|                                 | women          |                      |                     |               |                            |                |                   |                |                                |
|---------------------------------|----------------|----------------------|---------------------|---------------|----------------------------|----------------|-------------------|----------------|--------------------------------|
|                                 | age            | socioeconomic status | current partnership | height        | size of place of residence | education      | church membership | sickness index | sickness index-age interaction |
| age at menarche                 | <b>0.115*</b>  |                      |                     | <b>0.123*</b> |                            | 0.020          |                   | <b>-0.094*</b> | -0.014                         |
| age at first sexual intercourse | <b>0.122*</b>  |                      | <b>-0.109*</b>      | <b>0.030*</b> |                            | <b>0.277*</b>  | <b>0.339*</b>     | 0.005          | 0.038                          |
| sexual desire                   | <b>-0.159*</b> | -0.013               | <b>-0.569*</b>      |               |                            | 0.001          | <b>-0.185*</b>    | <b>0.130*</b>  | <b>-0.052</b>                  |
| sexual activity                 | <b>-0.172*</b> | -0.007               | <b>0.962*</b>       | <b>0.024</b>  |                            |                |                   | <b>-0.091*</b> | <b>-0.096*</b>                 |
| number of sexual partners       | <b>-0.110*</b> |                      | -0.046              | <b>0.035*</b> | <b>0.028</b>               |                | <b>-0.203*</b>    | <b>-0.045</b>  | <b>-0.106*</b>                 |
| number of children              | <b>0.707*</b>  |                      | <b>0.287*</b>       | 0.002         |                            | <b>-0.077*</b> | <b>0.132*</b>     | <b>-0.075*</b> | <b>-0.078*</b>                 |
|                                 | men            |                      |                     |               |                            |                |                   |                |                                |
|                                 | age            | socioeconomic status | current partnership | height        | size of place of residence | education      | church membership | sickness index | sickness index-age interaction |
| age at first sexual intercourse | <b>0.107*</b>  |                      | <b>-0.138*</b>      |               | <b>-0.050*</b>             | <b>0.242*</b>  | <b>0.189*</b>     | <b>0.061*</b>  | 0.015                          |
| sexual desire                   | <b>-0.122*</b> |                      | <b>-0.217*</b>      |               |                            | 0.014          | <b>-0.099*</b>    | <b>0.140*</b>  | <b>-0.054*</b>                 |
| sexual activity                 | <b>-0.094*</b> | <b>0.022</b>         | <b>1.002*</b>       | <b>0.024</b>  |                            |                | <b>-0.103*</b>    | <b>-0.158*</b> | <b>-0.043</b>                  |
| number of sexual partners       | -0.016         | <b>0.045</b>         | <b>0.208*</b>       | <b>0.021</b>  | <b>0.020</b>               |                | <b>-0.141*</b>    | <b>-0.053</b>  | -0.031                         |
| number of children              | <b>0.628*</b>  | <b>0.024*</b>        | <b>0.424*</b>       |               | <b>-0.020*</b>             | <b>-0.014</b>  | <b>0.165*</b>     | <b>-0.040*</b> | <b>-0.109*</b>                 |

**Supplementary table S6.** Associations of the sickness index and covariates with each variable related to sexual life and reproduction in GLM analyses with complete data. This table shows the results (standardised beta coefficients) of eleven GLM analyses (Type III sums of squares) which analyse associations between variables related to sexual life and reproduction (first column) and the sickness index and covariates. In accordance with preregistration, each model includes only covariates with Kendall's Tau > 0.02 or < -0.02 for correlation with output variables (see Supplementary table S3). Current partnership and church membership were treated as binary variables with 0 indicating no current partnership and no church membership, and 1 indicating being in a partnership and church membership. Associations with p values under 0.05 are in bold and those with p values under 0.005 are marked with asterisks.

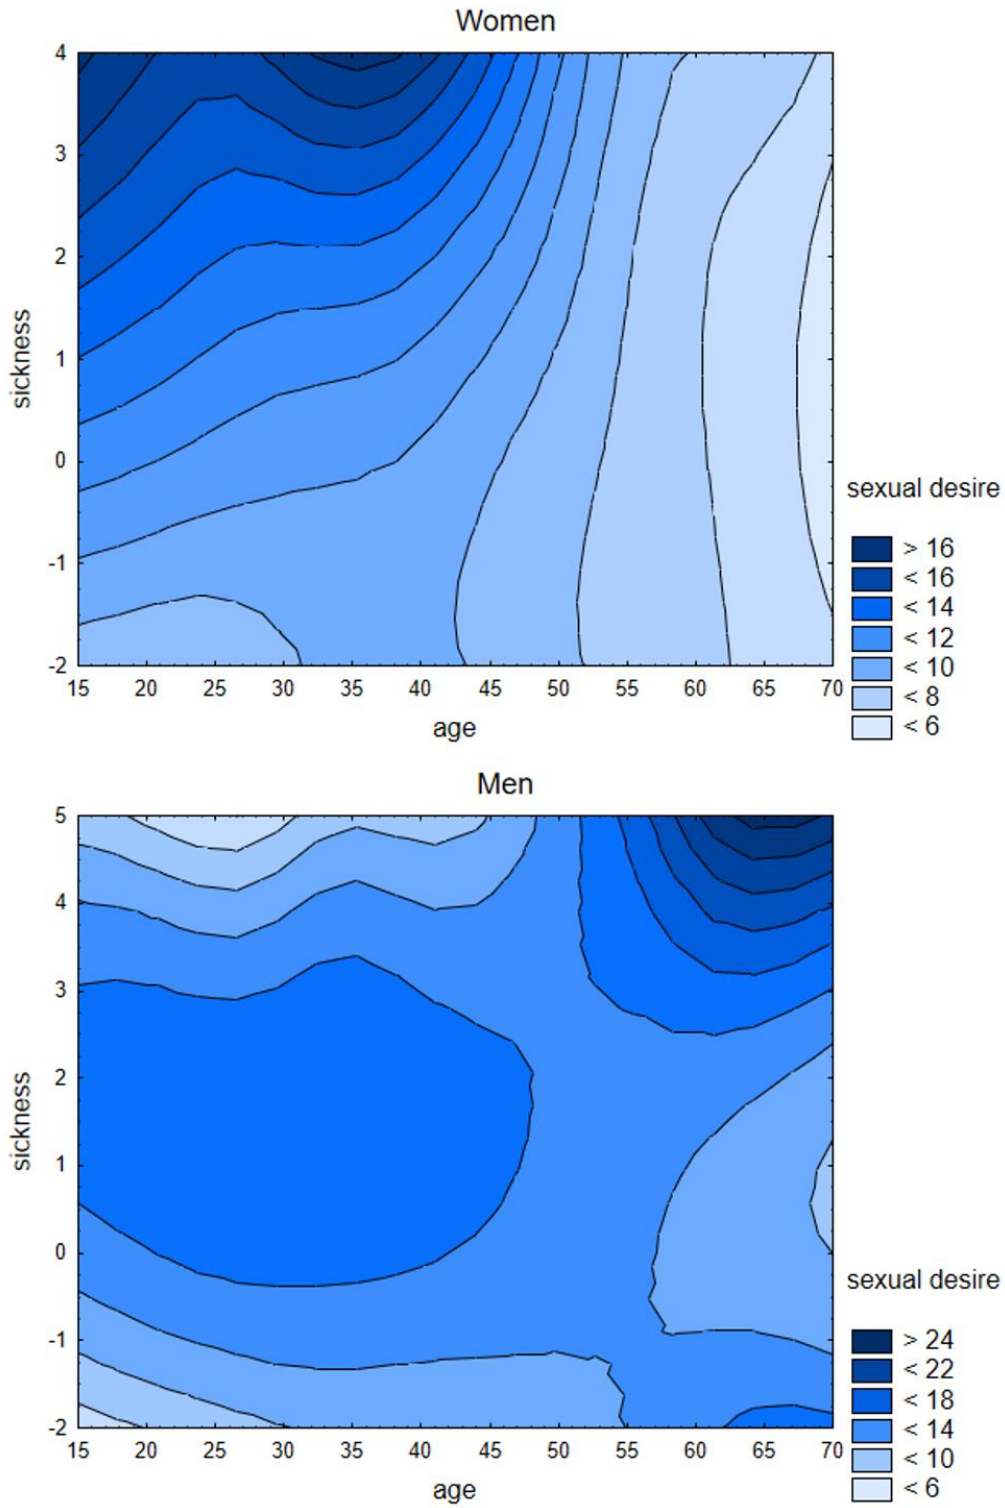

**Supplementary figure S1.** The effects of the sickness index and age on sexual desire in women and men. This figure shows XYZ contour plots with distance-weighted least-squares fitting used for extrapolation.



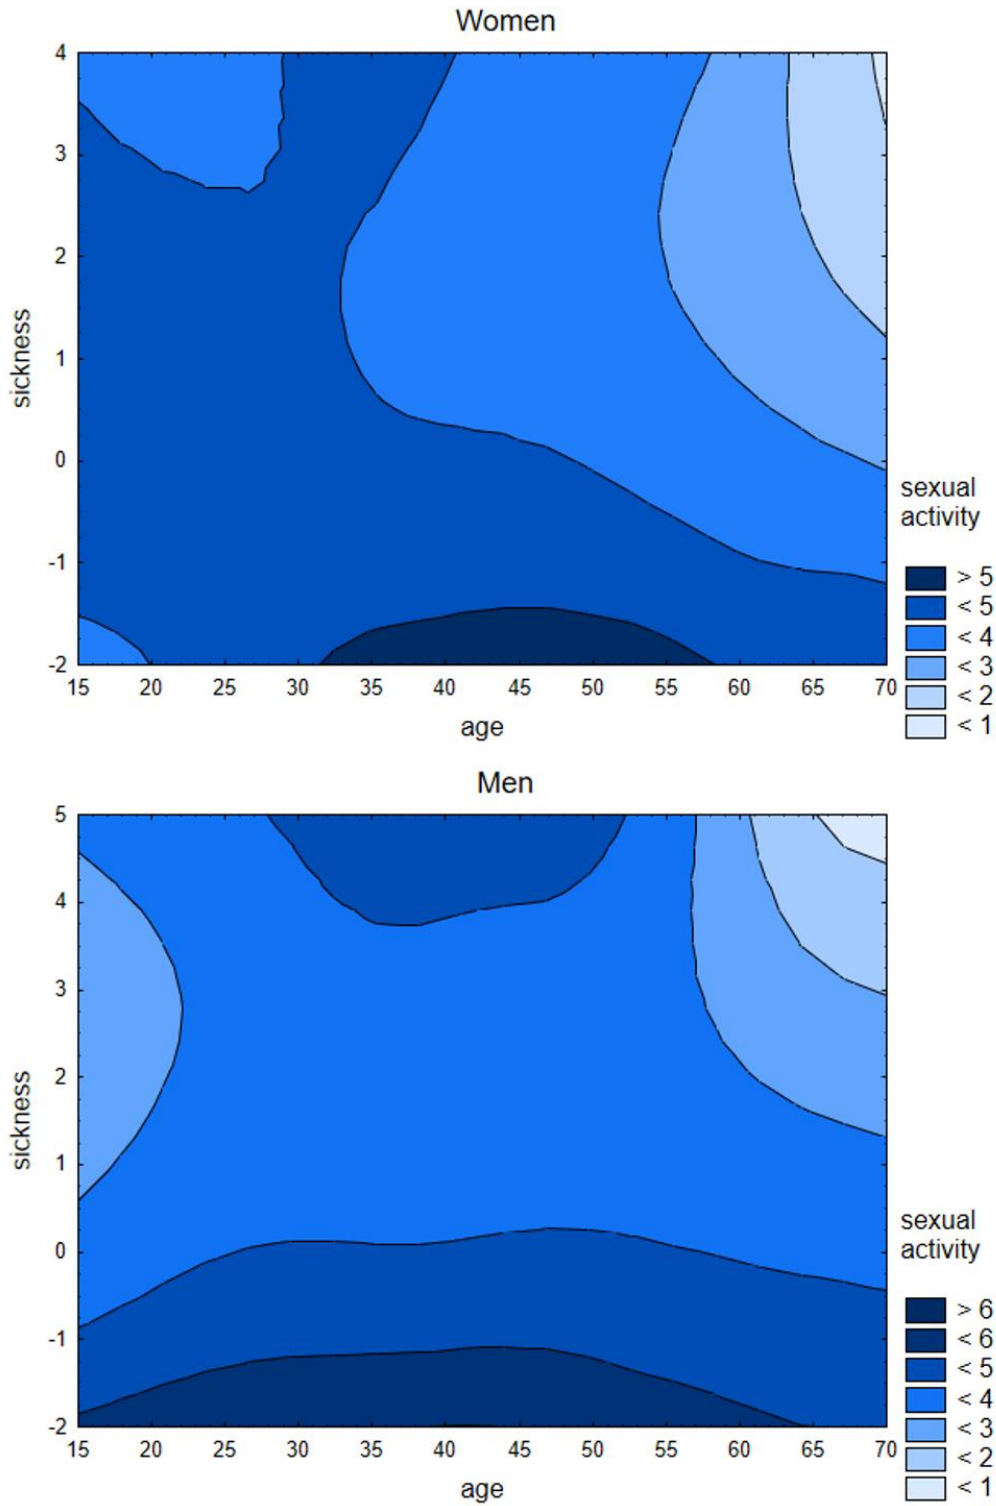

**Supplementary figure S2.** The effects of the sickness index and age on sexual activity in women and men. This figure shows XYZ contour plots with distance-weighted least-squares fitting used for extrapolation.

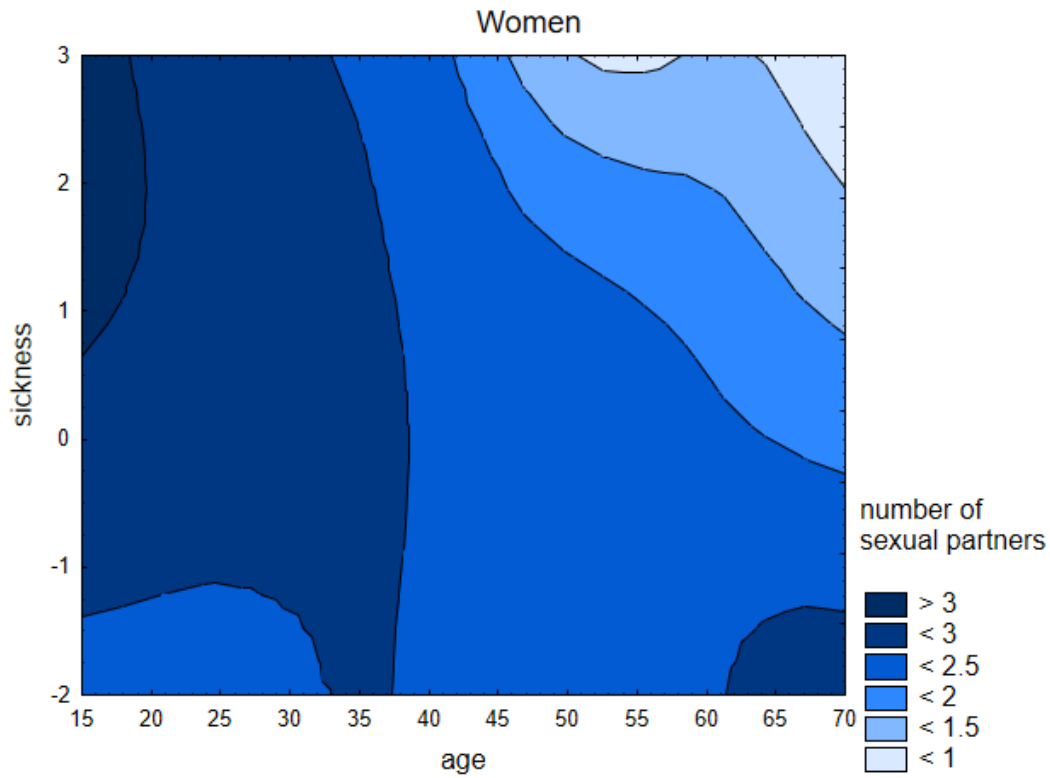

**Supplementary figure S3.** The effects of the sickness index and age on the number of sexual partners in women. This figure shows XYZ contour plots with distance-weighted least-squares fitting used for extrapolation.

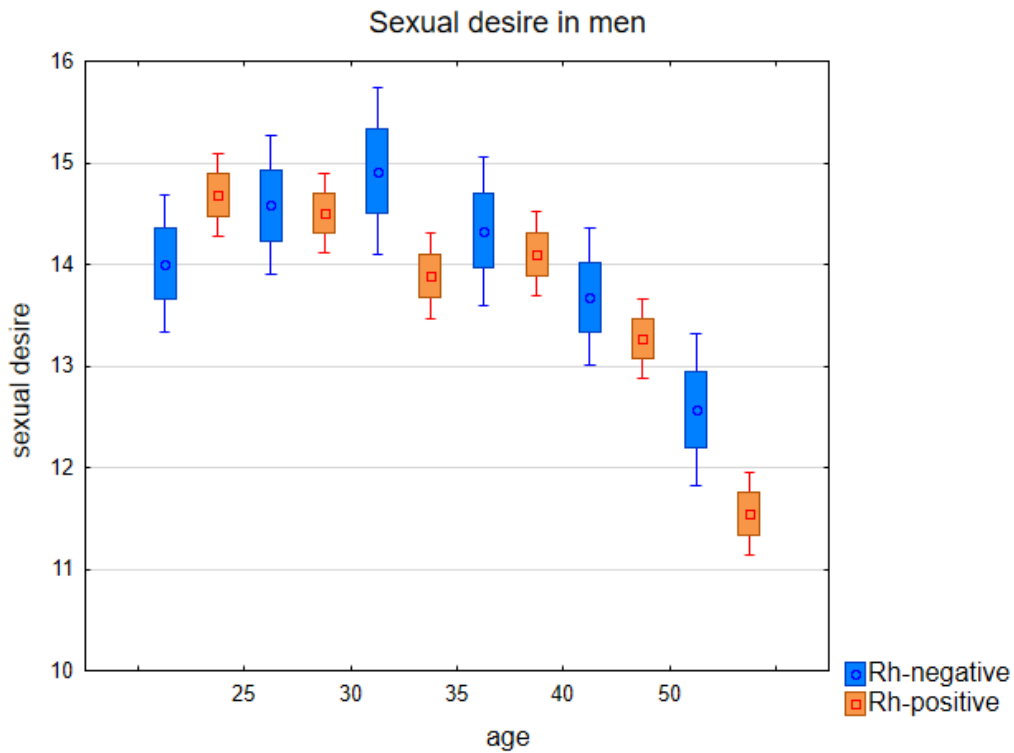

**Supplementary figure S4.** Box plot of sexual desire in men. This figure shows a box plot of sexual desire against age and Rh phenotype for men. Middle point = mean; box = mean+SE; whiskers = mean+95 confidence interval.

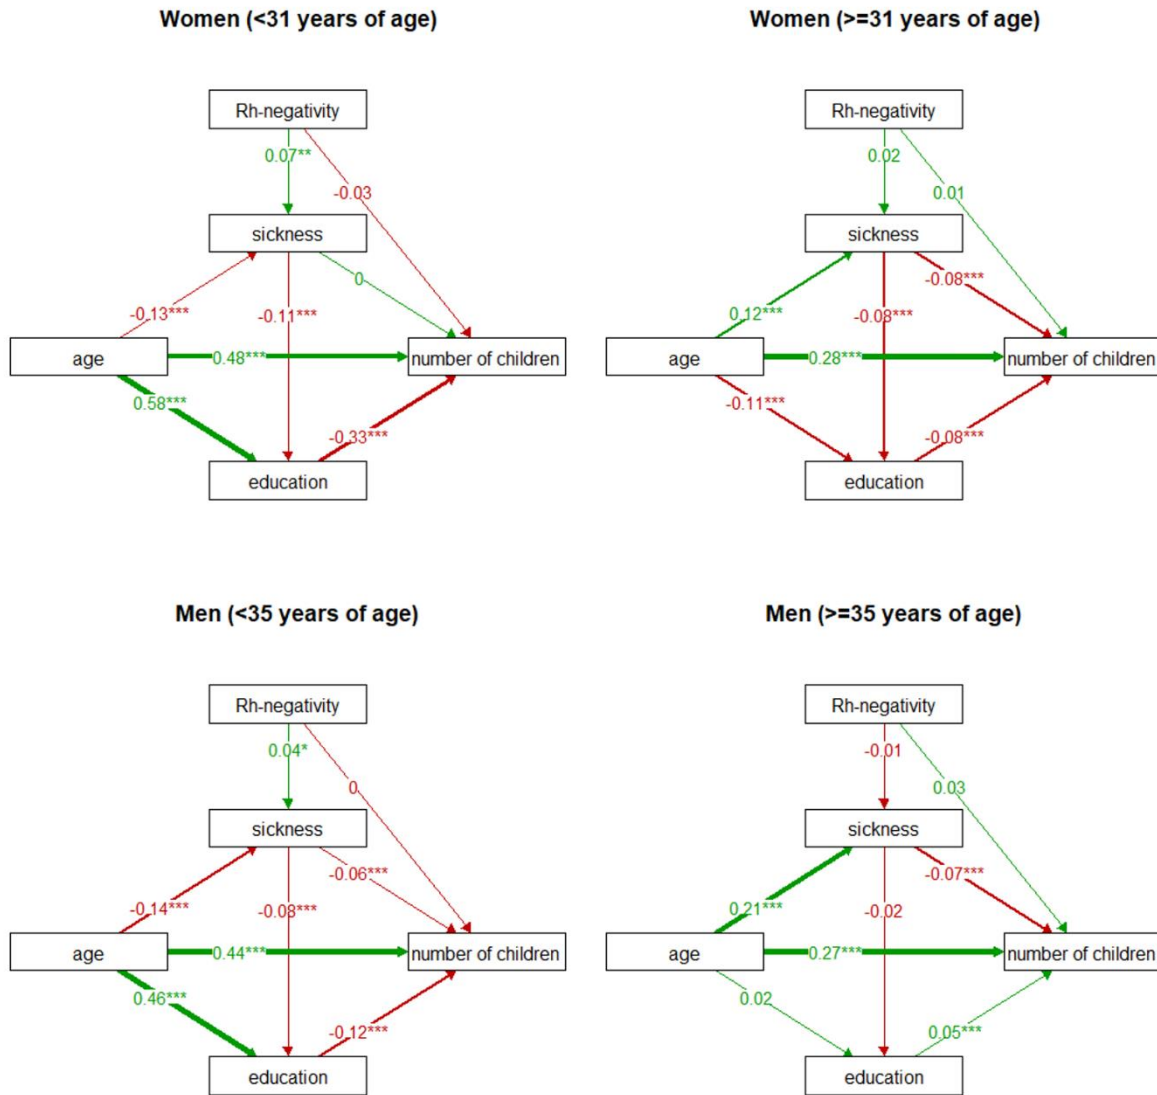

**Supplementary figure S5.** Direct and indirect effects of Rh-negativity on the number of children in women and men. This figure displays the results of path analyses showing the relations between the number of children, Rh-negativity, the sickness index, education, and age for women under 31 years of age (top left), women over 31 years of age (top right), men under 35 years of age (bottom left), and men over 35 years of age (bottom right). The numbers at arrows show standardised parameter estimates. Associations with p values under 0.01 are marked by ‘\*\*’, and those with p values under 0.001 are marked by ‘\*\*\*’.
